# Supplementary figures and images for: Description and Characterization of the Odontella aurita OAOSH22, a Marine Diatom Rich in Eicosapentaenoic Acid and Fucoxanthin, Isolated from Osan Harbor, Korea
Source: MDPI journal article supplement (doi:10.3390/md21110563), 2023-10-27

DAD1 B, Sig=445,4 Ref=off (1BE-1501.D)

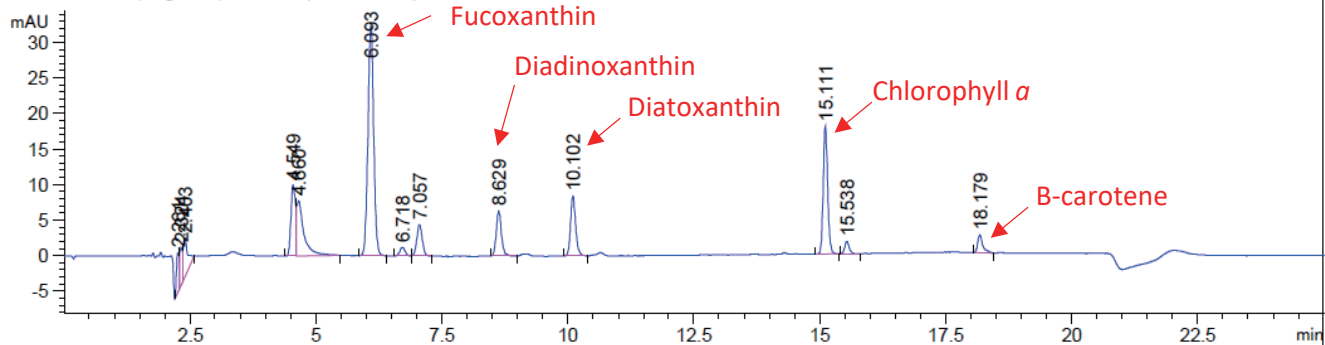

Supplement: s1 [file s1]

## Fluorescence

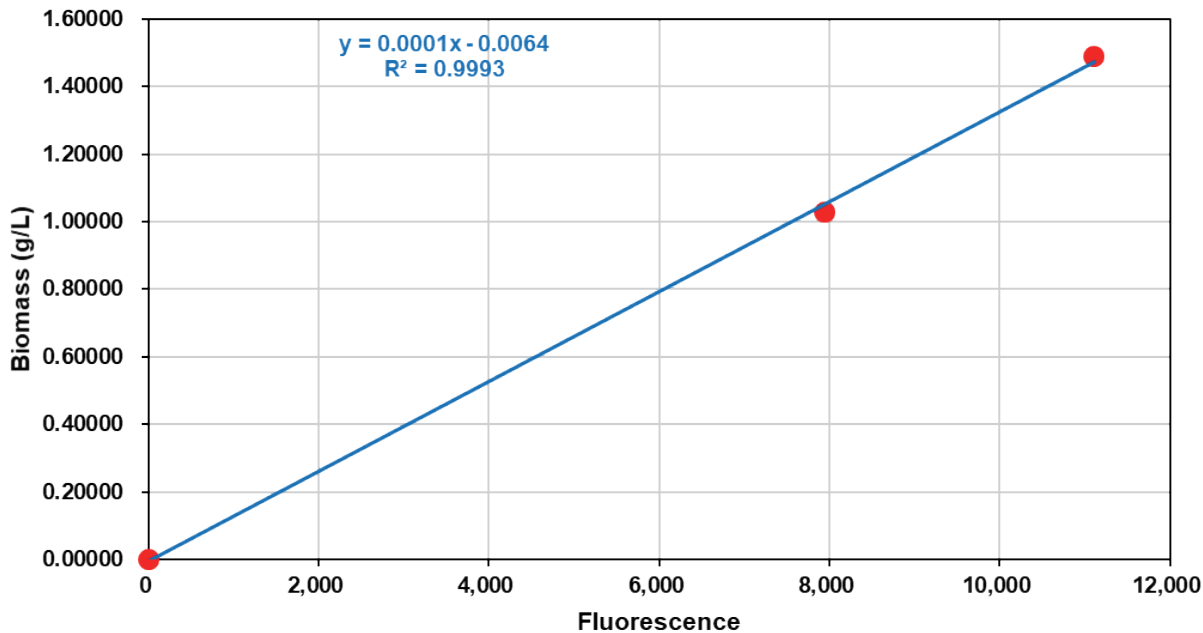

Fluorescence

$$y = 0.0001x - 0.0064$$

$$R^2 = 0.9993$$

Supplement: s1 [file s1]

A

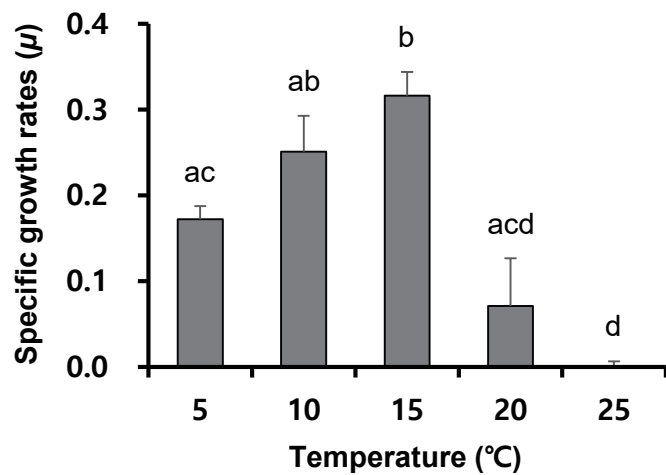

B

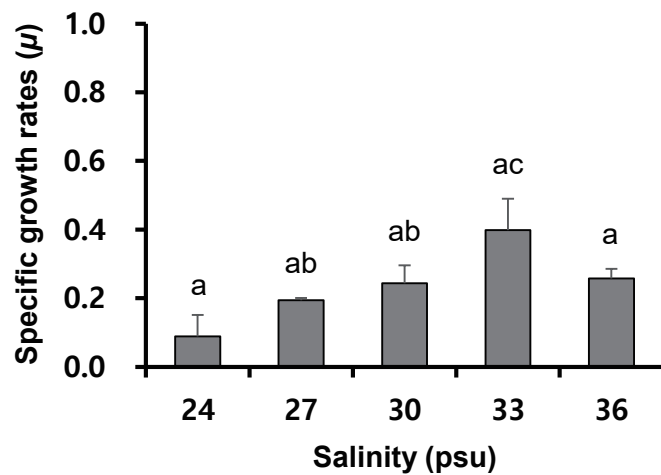

C

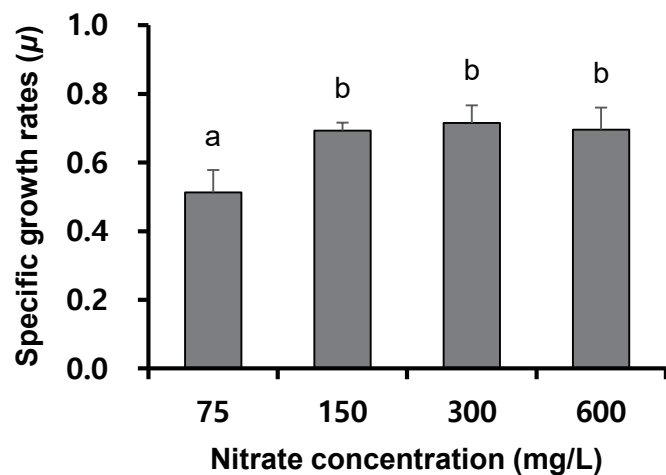

D

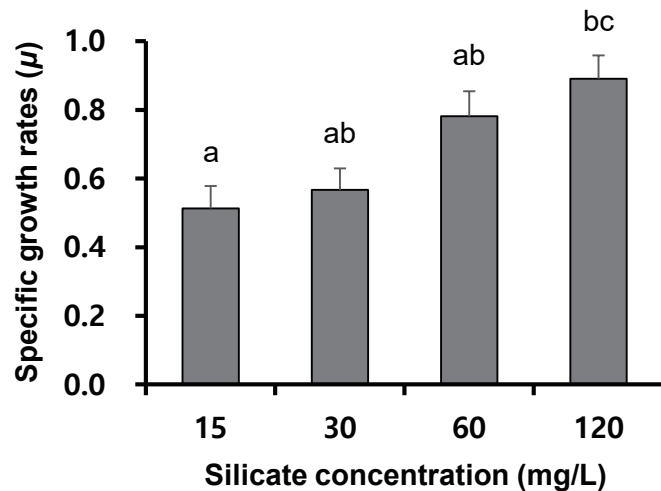

E

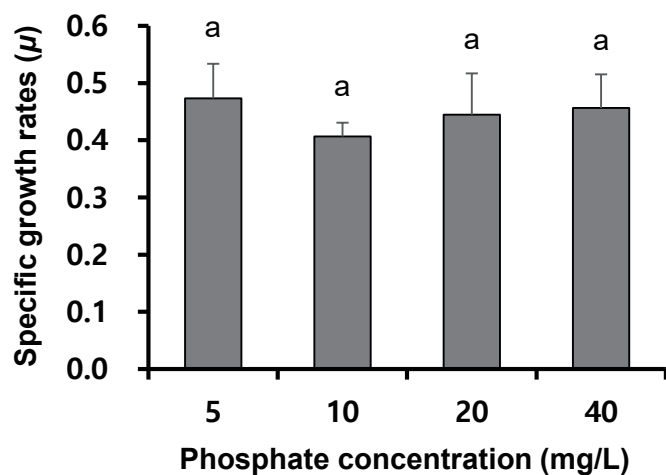

F

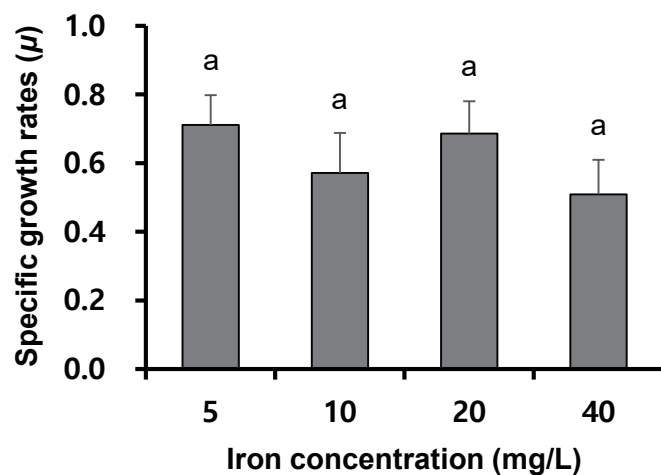

Supplement: s1 [file s1]
